# Supplementary material for: BaBi(SeO3)2Cl: a new polar material showing high second-harmonic generation efficiency enhanced by constructive alignment of chloride ions
Source: Royal Society of Chemistry journal article supplement (doi:10.1039/c5tc02925b), 2015-01-01
Supplement: c5tc02925b1.pdf [file c5tc02925b1.pdf]

# BaBi(SeO<sub>3</sub>)<sub>2</sub>Cl: a New Polar Material Showing High Second-Harmonic Generation Efficiency Enhanced by Constructive Alignment of Chloride Ions

Lei Geng,<sup>a</sup> Qiang Li,<sup>a</sup> Chang-Yu Meng,<sup>\*b</sup> Kai Dai,<sup>a</sup> Hong-Yan Lu,<sup>c</sup> Chen-Sheng Lin<sup>d</sup> and Wen-Dan Cheng<sup>d</sup>

<sup>a</sup>Department of Materials Science and Engineering, Huaibei Normal University, Huaibei, Anhui 235000, China

<sup>b</sup>Department of Chemistry and Materials, Yulin Normal University, Yulin, Guangxi 537000, China

<sup>c</sup>Department of Physics, Huaibei Normal University, Huaibei, Anhui 235000, China

<sup>d</sup>State Key Laboratory of Structural Chemistry, Fujian Institute of Research on the Structure of Matter, Chinese Academy of Sciences, Fuzhou, Fujian 350002, China

## Electronic Supplementary Information

**Fig. S1.** Photo of grown BaBi(SeO<sub>3</sub>)<sub>2</sub>Cl single crystals with plate-shape.

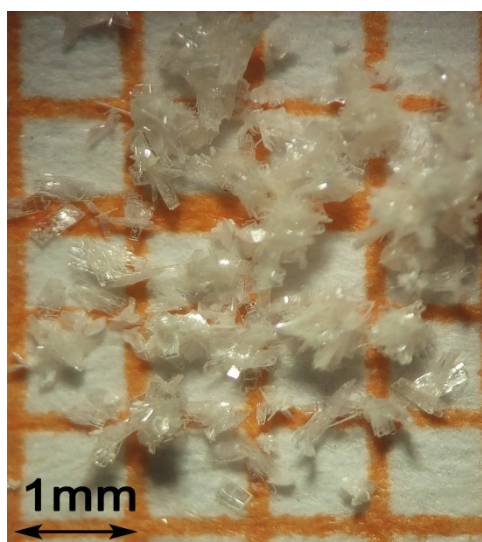

**Fig. S2.** Comparison of the measured and simulated powder XRD patterns for BaBi(SeO<sub>3</sub>)<sub>2</sub>Cl ( $\lambda = 1.5406 \text{ \AA}$ ). Phase 1: BaBi(SeO<sub>3</sub>)<sub>2</sub>Cl, Phase 2: Bi<sub>2</sub>(SeO<sub>3</sub>)<sub>3</sub>.

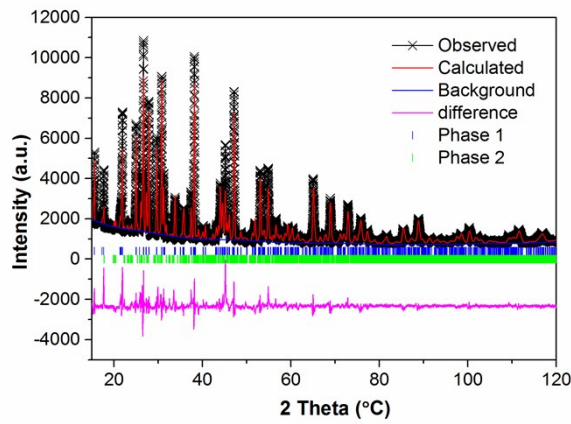

**Fig. S3.** Calculated SHG coefficients of BaBi(SeO<sub>3</sub>)<sub>2</sub>Cl.

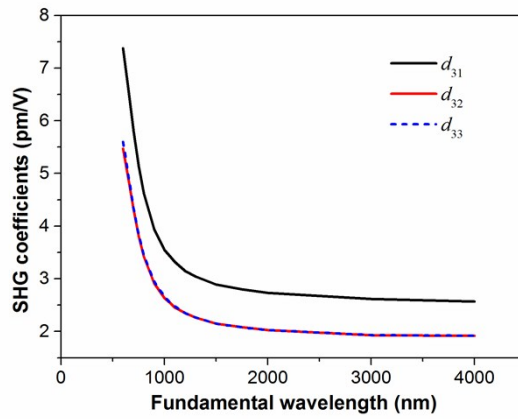

**Fig. S4.** Calculated refractive index along the principal axis of BaBi(SeO<sub>3</sub>)<sub>2</sub>Cl.

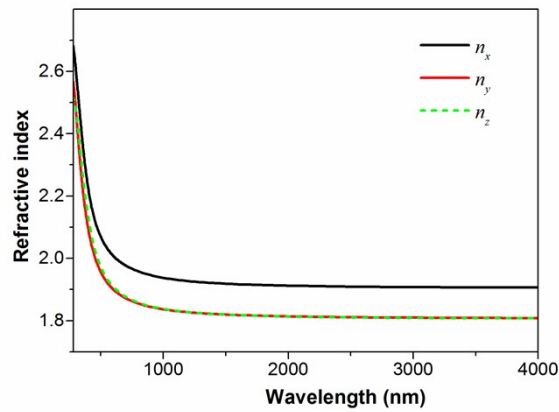

**Table S1.** The atomic coordinates ( $\times 10^4$ ) and equivalent isotropic displacement parameters ( $\text{Å}^2 \times 10^3$ ) for BaBi(SeO<sub>3</sub>)<sub>2</sub>Cl.  $U(\text{eq})$  is defined as one third of the trace of the orthogonalized  $U_{ij}$  tensor.

| Atom | $x$ | $y$ | $z$ | $U(\text{eq})$ |
|------|-----|-----|-----|----------------|
|      |     |     |     |                |

|       |          |         |          |       |
|-------|----------|---------|----------|-------|
| Ba(1) | 0        | 2253(1) | 481(1)   | 10(1) |
| Bi(1) | 0        | 4245(1) | 3378(1)  | 13(1) |
| Se(1) | 0        | 308(1)  | 1893(2)  | 9(1)  |
| Se(2) | 0        | 1501(1) | 5606(2)  | 7(1)  |
| O(1)  | 2477(10) | 4816(3) | 1239(11) | 14(1) |
| O(2)  | 2507(10) | 3368(4) | 2170(10) | 12(1) |
| O(3)  | 0        | 834(5)  | 0(15)    | 14(2) |
| O(4)  | 0        | 2237(4) | 4474(14) | 10(2) |
| Cl(1) | 0        | 6469(2) | 2417(5)  | 20(1) |

**Table S2.** The definitions of special  $k$ -point and corresponding state energies in the first Brillouin zone.

| $k$ -point       | Lower energy/eV | Higher energy/eV |
|------------------|-----------------|------------------|
| G (0 0 0)        | 0               | 3.610013         |
| Z (0 0 0.5)      | -0.20734        | 3.625932         |
| T (-0.5 0 0.5)   | -0.05697        | 4.212182         |
| Y (-0.5 0 0)     | 0               | 4.025642         |
| S (-0.5 0.5 0)   | -0.0004         | 4.032774         |
| X (0 0.5 0)      | -0.0668         | 3.610223         |
| U (0 0.5 0.5)    | -0.24126        | 3.646134         |
| R (-0.5 0.5 0.5) | -0.05678        | 4.21139          |
